# Supplementary material for: Information Transfer and Criticality in the Ising Model on the Human Connectome
Source: PubMed Central journal article supplement (PMC3976308; doi:10.1371/journal.pone.0093616), 2014-04-04
Supplement: pone.0093616.s001.pdf [file pone.0093616.s001.pdf]

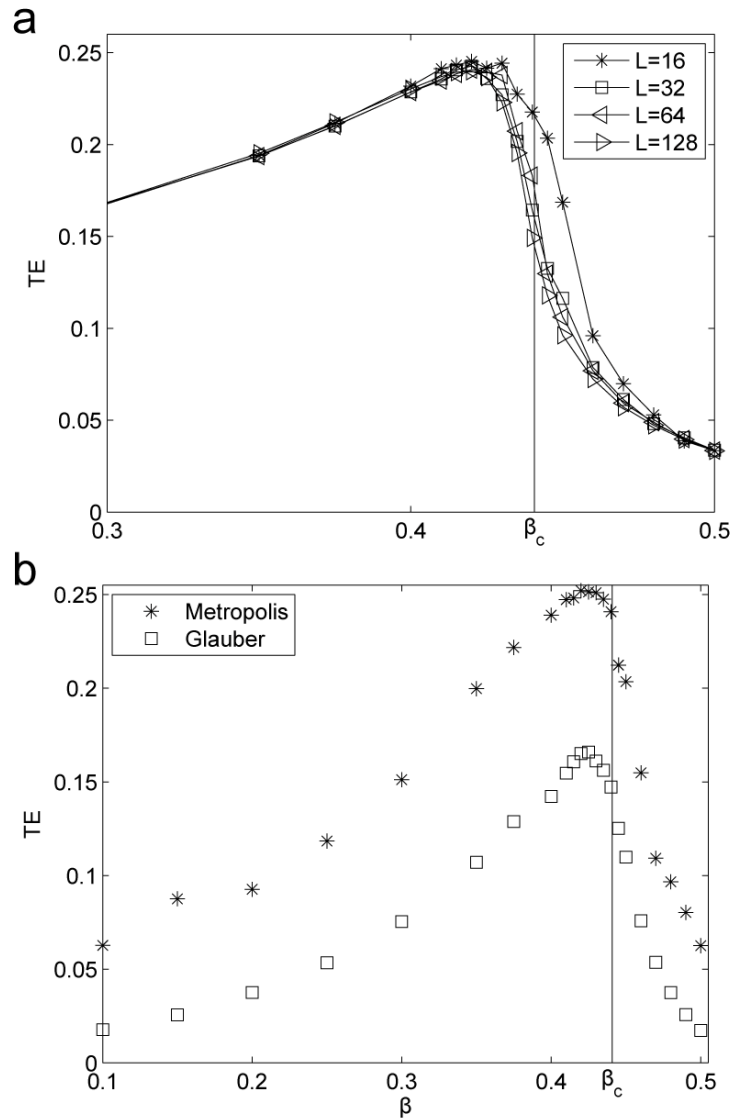

Figure 1: **Ising model on a 2D lattice.** a: The sum of bivariate transfer entropies for all network pairs is depicted as a function of the inverse temperature  $\beta$  for the 2D Ising model on a square lattice of size  $L^2$ , with  $L = 16, 32, 64$ , and 128. Simulations were performed with a Glauber dynamics and periodic boundary conditions. The vertical line corresponds to the critical point. The curves are shown to converge for  $L$  greater than 16. b: The Ising model on a 2D square lattice of size  $L^2$ , with  $L = 16$ . Two different dynamics have been implemented: Metropolis (asterisks) and Glauber dynamics (squares). Although it exists a rescaling in both curves, their shape keep the same. a,b: Transfer entropies have been evaluated averaging over 20 runs of 10000 iterations, from a random initial condition and after stationary state convergence.
